# Supplementary figures and images for: Organometallic cobalt(iii) complexes with tridentate imino-oximic ligands: structural, spectroscopic and electrochemical properties
Source: Royal Society of Chemistry journal article supplement (doi:10.1039/b109282k), 2002-01-01

# Raman spectra of 2a

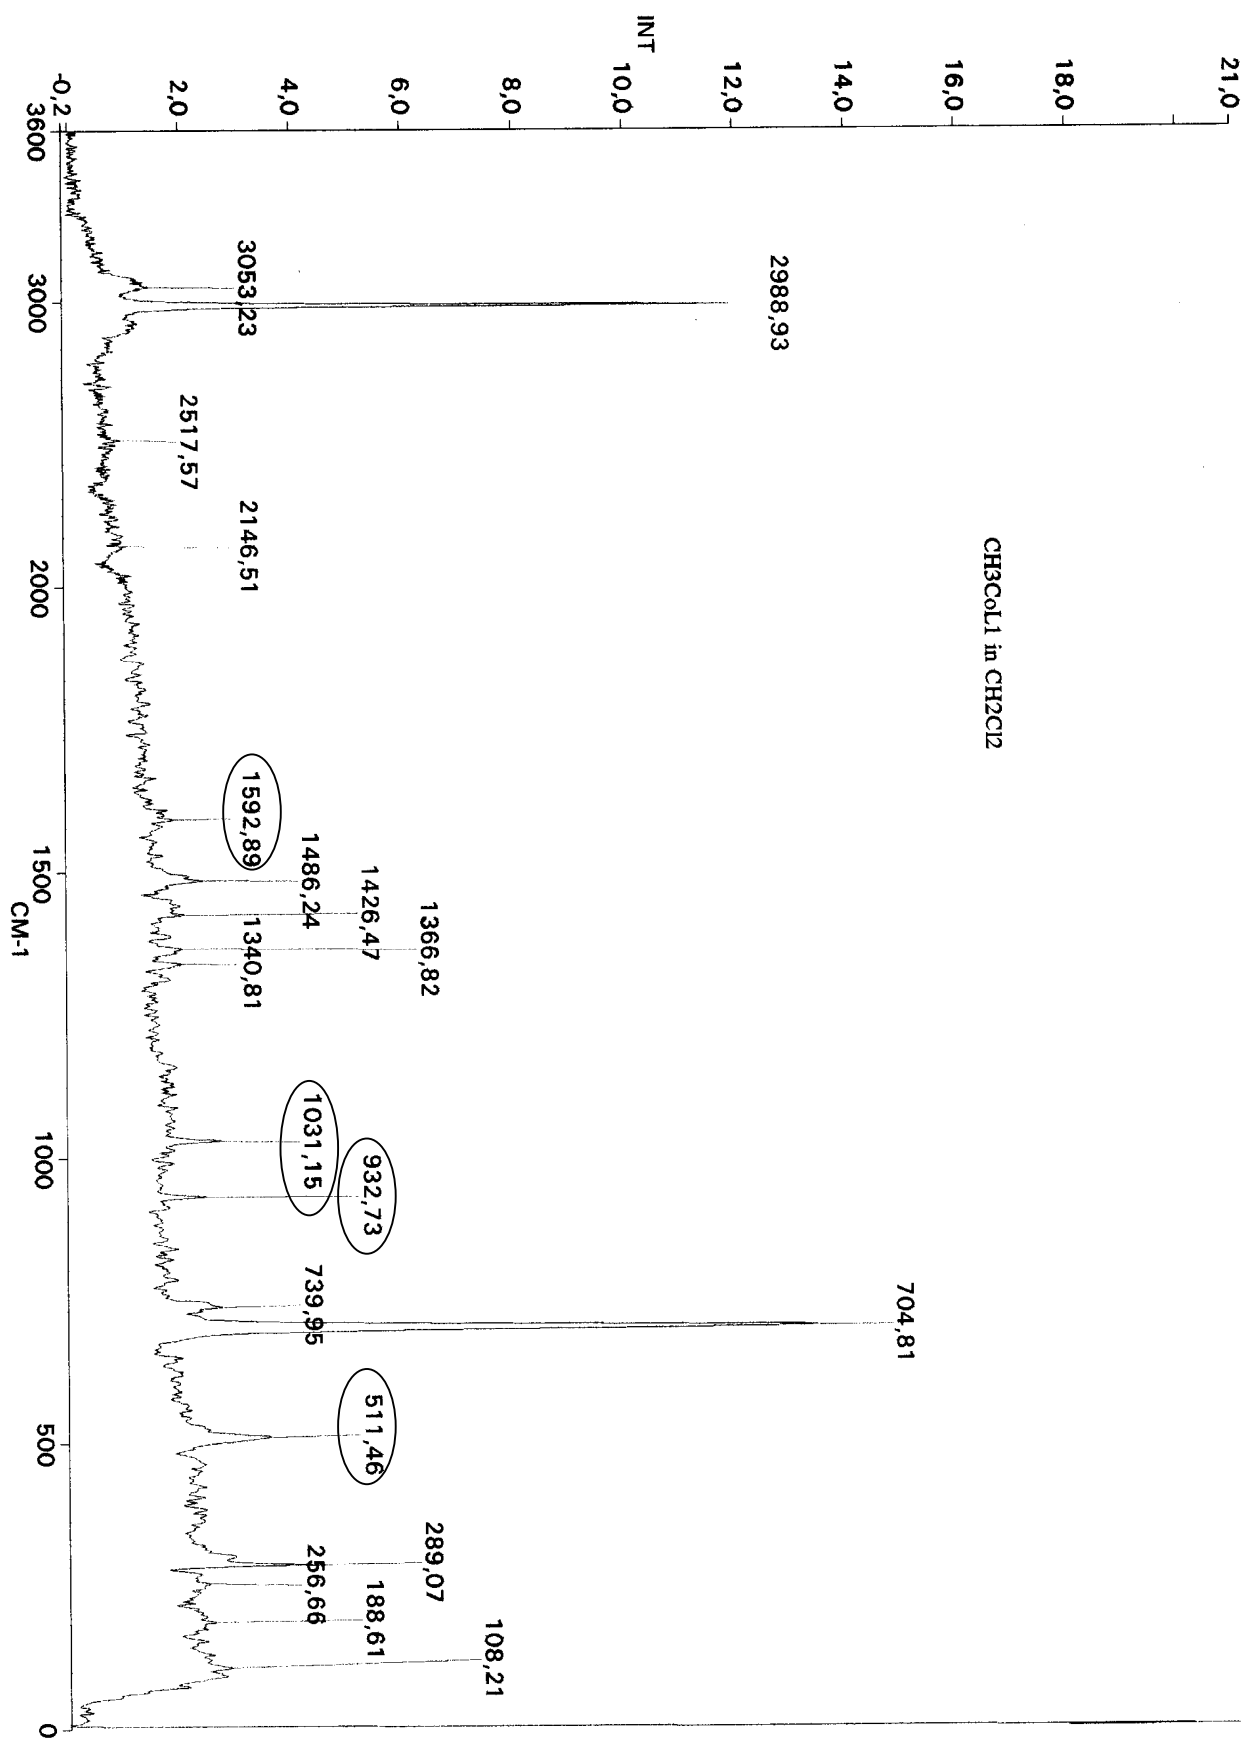

# Raman spectra of deuterated 2a

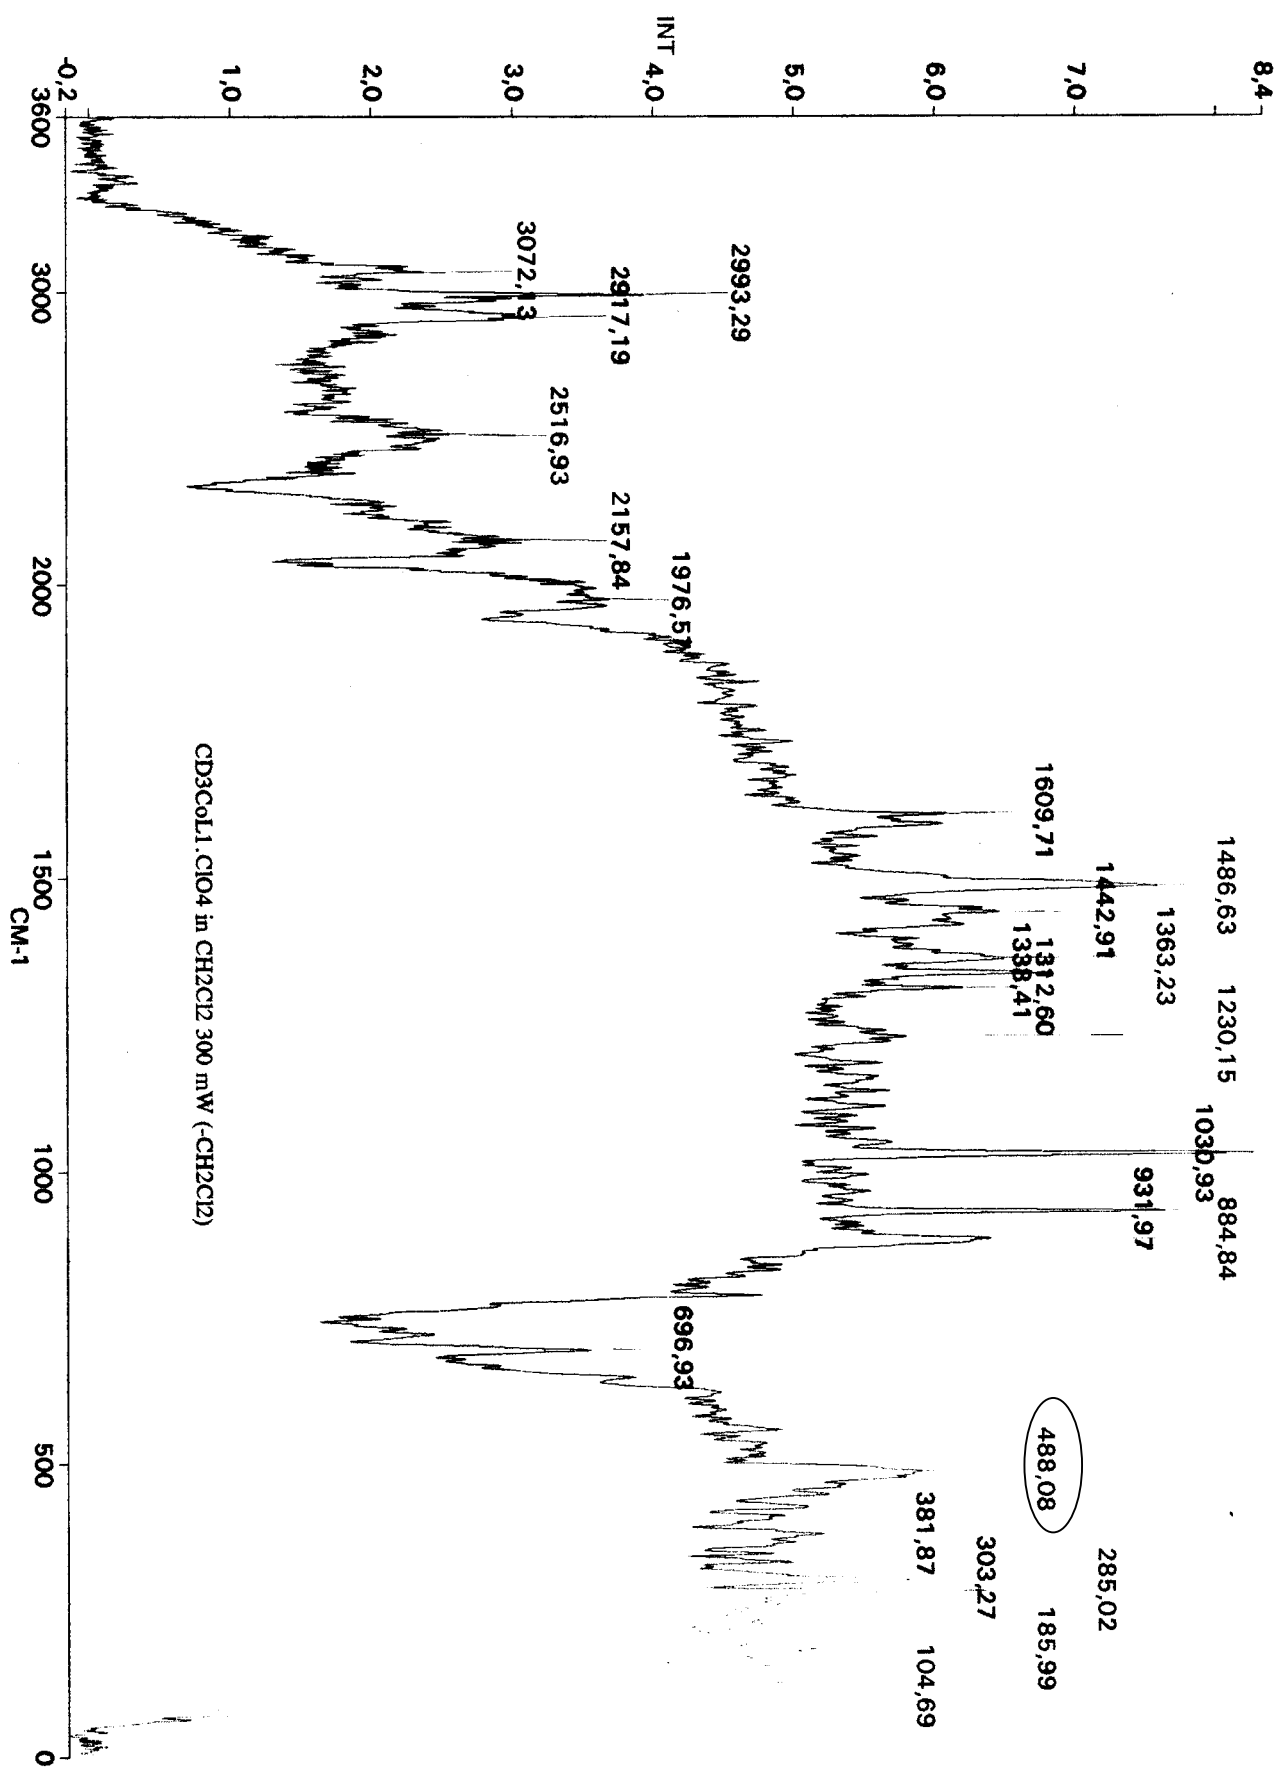

Supplement: b109282k.pdf [file b109282k.pdf]
